# Supplementary material for: Metal-free functionalized carbonized cotton for efficient solar steam generation and wastewater treatment
Source: Royal Society of Chemistry journal article supplement (doi:10.1039/d1ra08438k), 2022-01-01
Supplement: d1ra08438k1.pdf [file d1ra08438k1.pdf]

## Metal-free Functionalized Carbonized Cotton for Efficient Solar Steam Generation and Wastewater Treatment

Hiran D. Kiriarachchi<sup>a</sup>, Amr A. Hassan<sup>b</sup>, Fathi S. Awad<sup>c\*</sup> and M. Samy El-Shall<sup>a\*</sup>

<sup>a</sup>) Department of Chemistry, Virginia Commonwealth University, Richmond, VA 23284, USA

<sup>b</sup>) Chemistry Department, Faculty of Science, Ain Shams University, Cairo 11566, Egypt

<sup>c</sup>) Chemistry Department, Faculty of Science, Mansoura University, Mansoura 35516, Egypt

### Supplementary Material

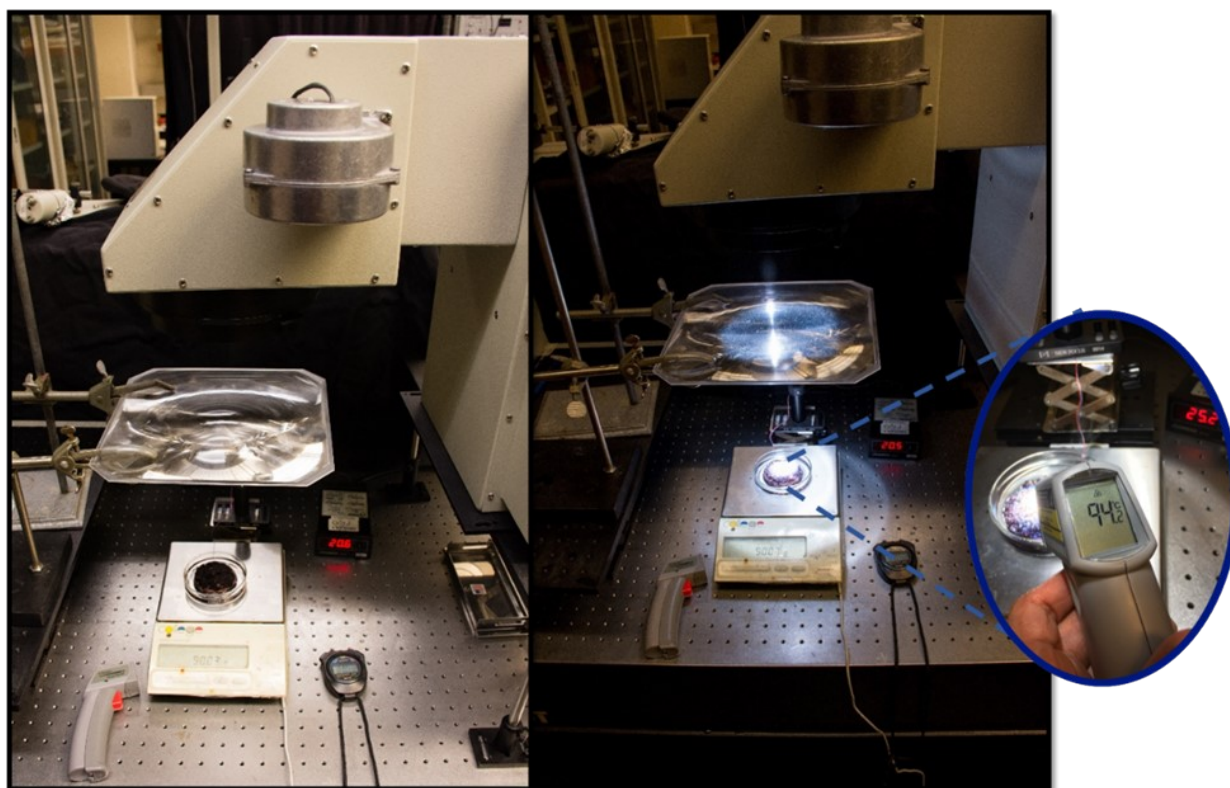

**Figure S1.** Experimental set up for the solar steam generation. Left panel shows the solar simulator switched off and the right panel shows the solar simulator switched on. Magnified image shows the surface temperature increased to 94 °C while the bulk temperature remained around 25 °C.

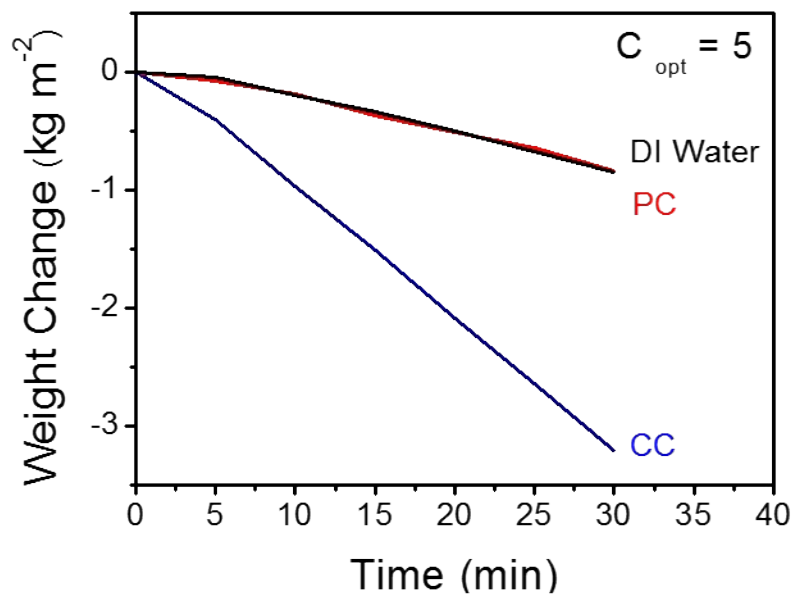

**Figure S2.** Solar steam generation rate of CC, PC and DI water at a solar intensity of 5 kW m<sup>-2</sup> (5 sun).
